# Supplementary material for: Bioactive glass doped with noble metal nanoparticles for bone regeneration: in vitro kinetics and proliferative impact on human bone cell line
Source: Royal Society of Chemistry journal article supplement (doi:10.1039/d1ra03876a), 2021-01-01
Supplement: d1ra03876a1.pdf [file d1ra03876a1.pdf]

# **Bioactive glass doped with noble metal nanoparticles for bone regeneration: *in-vitro* kinetics and proliferative impact on human bone cell line**

**Amany A. Mostafa <sup>a,b\*</sup>, Mayyada M.H. El-Sayed <sup>c,\*</sup>, Ahmed N. Emam <sup>a,b</sup>, Ahmed A. Abd-Rabou <sup>d,e</sup>, Reham M. Dawood <sup>f</sup> and Hassane Oudadesse <sup>g</sup>**

<sup>a</sup> Refractories, Ceramics and Building Materials Department (Biomaterials group), National Research Centre (NRC), El Bohouth St., Dokki, 12622 Cairo, Egypt,

<sup>b</sup> Nanomedicine & Tissue Engineering Lab., Medical Research Center of Excellence (MRCE), NRC, Egypt

<sup>c</sup> Chemistry Department, School of Sciences and Engineering, American University in Cairo, AUC Avenue, New Cairo, 11835, Egypt

<sup>d</sup> Hormones Department, Medical Research Division, National Research Centre, Dokki, Giza, Egypt

<sup>e</sup> Stem Cell Lab, Center of Excellence for Advanced Sciences, National Research Centre, Dokki, Giza, Egypt

<sup>f</sup> Department of Microbial Biotechnology, Genetic Engineering Division, National Research Centre, 33 EL Bohouth Street Dokki, Giza, Egypt, 12622

<sup>g</sup> Universite de Rennes 1, UMR CNRS 6226, 263 av. du general Leclerc, 35042 Rennes Cedex, France

**\*Corresponding author: [amani.mostafa@gmail.com](mailto:amani.mostafa@gmail.com), [aa.monem@nrc.sci.eg](mailto:aa.monem@nrc.sci.eg)  
[Mayyada@aucegypt.edu](mailto:Mayyada@aucegypt.edu), [Mayyadas@gmail.com](mailto:Mayyadas@gmail.com)**

***Supplementary information***

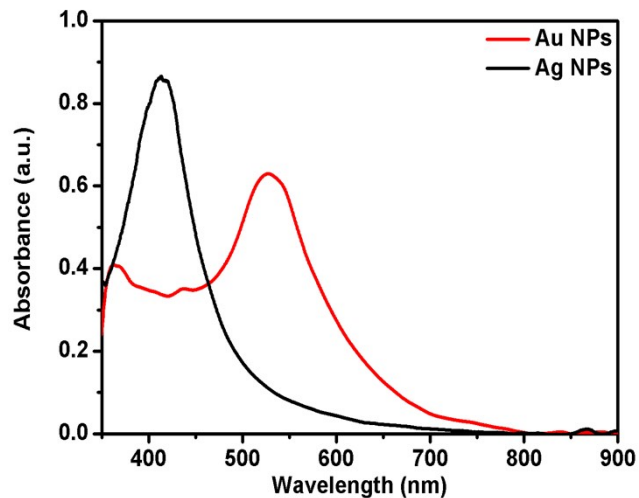

**Fig. S1** Normalized absorption spectra for the as-prepared Gold (Au, red line) and (b) Silver (Ag, black line) nanoparticles.

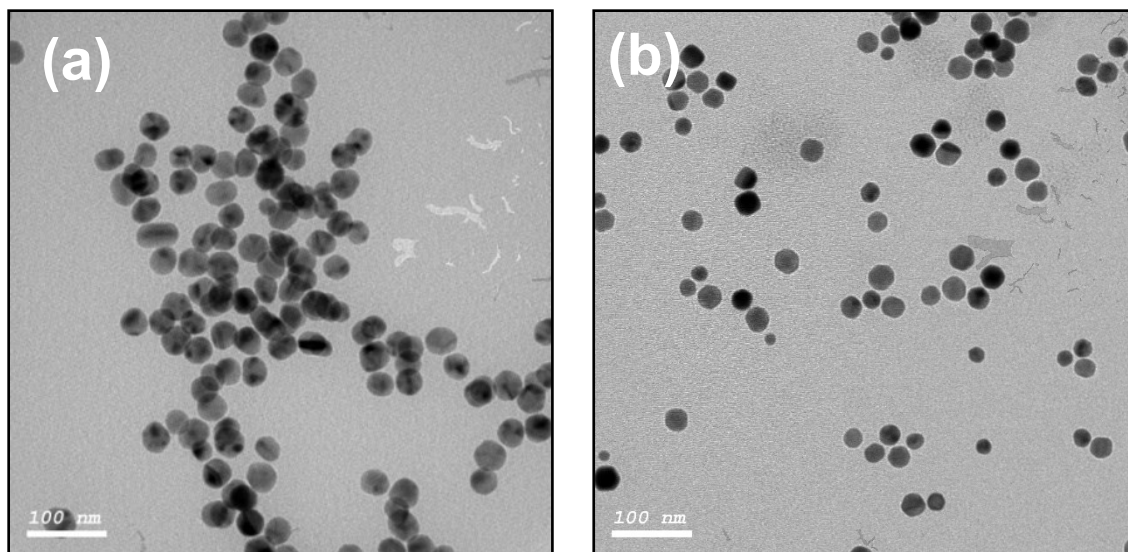

**Fig. S2** TEM micrographs for both of as-prepared (a) silver (Ag) and (b) gold (Au) nanoparticles. (Scale bar 100 nm).

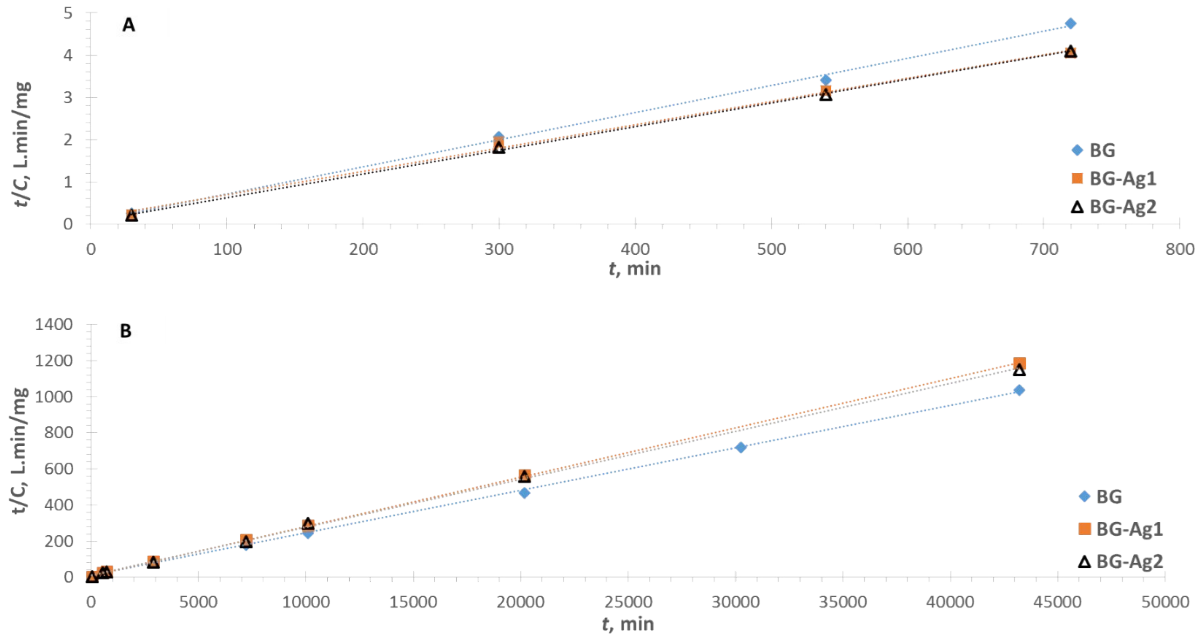

**Fig. S3** Linear kinetic plots of the pseudo-second-order kinetic model pertaining to the concentration profiles for the release of Ca (A) and Si (B) from BG-Ag after soaking in SBF.

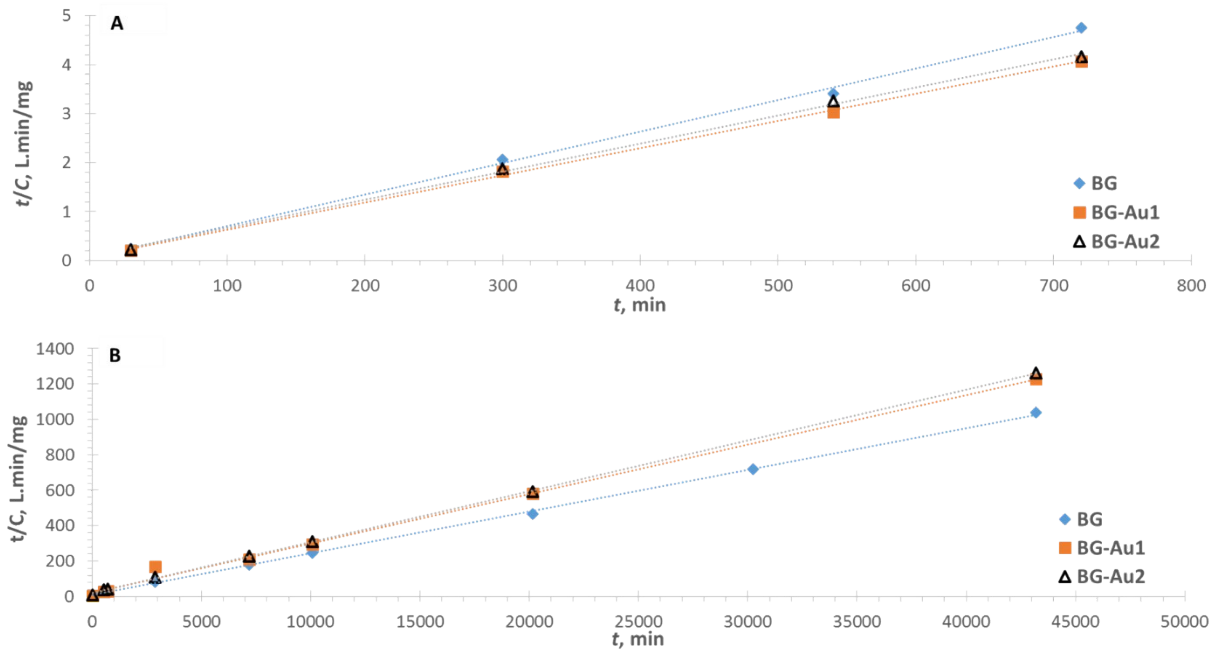

**Fig. S4** Linear kinetic plots of the pseudo-second-order kinetic model pertaining to the concentration profiles for the release of Ca (A) and Si (B) from BG-Au after soaking in SBF.

**Table S1.** Cellular proliferation percentage (%) upon treatment of osteosarcoma MG-63 cell with different doses of BG, and Ag or Au doped BG

| Sample                    | BG                | BG-Ag1            | BG-Ag2            | BG-Au1            | BG-Au2            |
|---------------------------|-------------------|-------------------|-------------------|-------------------|-------------------|
| Dose ( $\mu\text{g/ml}$ ) |                   |                   |                   |                   |                   |
| 0                         | 100               | 100               | 100               | 100               | 100               |
| 2                         | 94.94311          | 124.511141        | 137.816245        | 121.852326        | 126.496391        |
| 4                         | 114.243574        | 133.833561        | 119.707057        | 121.937687        | 123.55763         |
| 6                         | <b>141.255794</b> | 131.969077        | <b>146.915224</b> | 109.773794        | <b>131.120619</b> |
| 8                         | 128.402866        | <b>136.061846</b> | 136.706613        | 126.547162        | 102.121959        |
| 10                        | 128.613569        | 117.371533        | 116.466933        | <b>129.236022</b> | 128.354726        |
